# Supplementary material
Source: publisher figshare collection journal article supplement (https://sage.figshare.com/ndownloader/files/13585874)
Supplement: Supplementary file 1 [file 13585874]

## Sheet: Sheet1
Supplementary Table 1. Correlation tables of non-parametric Spearman r and p values for controls, CKD5D patients, and each respective (+) and (-) neurovascular disease groups. Values corresponding to statistical significance are highlighted.
	P values														R values
	controls														controls
			KIM-1	NT-ProBNP	NGAL	IL-18	ET-1	25(OH)D	PTH	PDGF	MPTF	Lp(a)					KIM-1	NT-ProBNP	NGAL	IL-18	ET-1	25(OH)D	PTH	PDGF	MPTF	Lp(a)
		KIM-1		0.450721	0.795186	0.226556	0.412713	0.247508	0.925269	0.788224	0.239244	0.472781				KIM-1		-0.109102	0.0376497	-0.174112	-0.118429	0.166611	-0.0136087	0.0389593	0.173145	-0.175332
		NT-ProBNP	0.450721		0.38747	0.909613	0.126123	0.609555	0.183648	0.857573	0.411849	0.126455				NT-ProBNP	-0.109102		0.124898	0.0164706	-0.219218	0.0739976	0.19113	-0.0260343	-0.121207	0.363158
		NGAL	0.795186	0.38747		0.151896	0.546913	0.329274	0.61536	0.0853424	0.33456	0.0130599				NGAL	0.0376497	0.124898		0.205666	0.0872349	0.14084	-0.0728024	-0.245783	0.142322	0.557895
		IL-18	0.226556	0.909613	0.151896		0.203027	0.211672	0.401187	0.87588	0.892804	0.134506				IL-18	-0.174112	0.0164706	0.205666		0.183131	-0.179736	0.121353	-0.0226595	-0.019975	0.35614
		ET-1	0.412713	0.126123	0.546913	0.203027		0.588239	0.874023	0.601674	0.970747	0.85264				ET-1	-0.118429	-0.219218	0.0872349	0.183131		-0.0784296	-0.0230013	0.0756282	-0.00543627	-0.0456943
		25(OH)D	0.247508	0.609555	0.329274	0.211672	0.588239		0.638204	0.987009	0.928517	0.668013				25(OH)D	0.166611	0.0739976	0.14084	-0.179736	-0.0784296		-0.0681442	-0.00236238	0.0132986	0.105263
		PTH	0.925269	0.183648	0.61536	0.401187	0.874023	0.638204		0.813167	0.741305	0.00122525				PTH	-0.0136087	0.19113	-0.0728024	0.121353	-0.0230013	-0.0681442		-0.034281	0.0489102	0.684511
		PDGF	0.788224	0.857573	0.0853424	0.87588	0.601674	0.987009	0.813167		0.300309	0.994303				PDGF	0.0389593	-0.0260343	-0.245783	-0.0226595	0.0756282	-0.00236238	-0.034281		0.152646	0.00175747
		MPTF	0.239244	0.411849	0.33456	0.892804	0.970747	0.928517	0.741305	0.300309		0.54023				MPTF	0.173145	-0.121207	0.142322	-0.019975	-0.00543627	0.0132986	0.0489102	0.152646		0.159314
		Lp(a)	0.472781	0.126455	0.0130599	0.134506	0.85264	0.668013	0.00122525	0.994303	0.54023					Lp(a)	-0.175332	0.363158	0.557895	0.35614	-0.0456943	0.105263	0.684511	0.00175747	0.159314
	Total CKD5D														Total CKD5D
			KIM-1	NT-ProBNP	NGAL	IL-18	ET-1	25(OH)D	PTH	PDGF	MPTF	Lp(a)					KIM-1	NT-ProBNP	NGAL	IL-18	ET-1	25(OH)D	PTH	PDGF	MPTF	Lp(a)
		KIM-1		0.771601	0.031777	0.852225	0.405093	0.0867776	0.810137	0.478162	0.100949	0.549598				KIM-1		-0.0310247	-0.22655	0.0199121	-0.0888276	0.181563	-0.0256792	-0.0757137	-0.187101	-0.0639017
		NT-ProBNP	0.771601		0.916104	0.986915	0.112599	0.928643	0.950757	0.392892	0.317549	0.042043				NT-ProBNP	-0.0310247		0.0112612	-0.0017533	0.168401	-0.0095732	-0.00660188	-0.0911465	-0.114649	-0.214801
		NGAL	0.031777	0.916104		0.189675	0.890364	0.785421	0.0142939	0.467637	0.816393	0.683047				NGAL	-0.22655	0.0112612		0.139521	-0.0147352	-0.0290996	0.25746	0.0775303	0.0267167	-0.0436289
		IL-18	0.852225	0.986915	0.189675		0.662348	0.308858	0.816984	0.367977	0.430728	0.0849913				IL-18	0.0199121	-0.0017533	0.139521		0.0466565	-0.108466	-0.0247365	0.0960194	-0.0904952	-0.182583
		ET-1	0.405093	0.112599	0.890364	0.662348		0.052671	0.361161	0.40188	0.971424	0.201102				ET-1	-0.0888276	0.168401	-0.0147352	0.0466565		-0.204933	-0.0973872	0.0894342	-0.00412269	-0.136031
		25(OH)D	0.0867776	0.928643	0.785421	0.308858	0.052671		0.173654	0.26626	0.0691707	0.562503				25(OH)D	0.181563	-0.0095732	-0.0290996	-0.108466	-0.204933		0.144682	-0.118428	-0.206877	-0.0618515
		PTH	0.810137	0.950757	0.0142939	0.816984	0.361161	0.173654		0.0014876	0.903782	0.796848				PTH	-0.0256792	-0.00660188	0.25746	-0.0247365	-0.0973872	0.144682		-0.33007	0.0139115	0.0275148
		PDGF	0.478162	0.392892	0.467637	0.367977	0.40188	0.26626	0.0014876		0.266149	0.332288				PDGF	-0.0757137	-0.0911465	0.0775303	0.0960194	0.0894342	-0.118428	-0.33007		0.12745	0.103367
		MPTF	0.100949	0.317549	0.816393	0.430728	0.971424	0.0691707	0.903782	0.266149		0.063826				MPTF	-0.187101	-0.114649	0.0267167	-0.0904952	-0.00412269	-0.206877	0.0139115	0.12745		0.210893
		Lp(a)	0.549598	0.042043	0.683047	0.0849913	0.201102	0.562503	0.796848	0.332288	0.063826					Lp(a)	-0.0639017	-0.214801	-0.0436289	-0.182583	-0.136031	-0.0618515	0.0275148	0.103367	0.210893
	CKD5D (-)CCAD														CKD5D (-)CCAD
			KIM-1	NT-ProBNP	NGAL	IL-18	ET-1	25(OH)D	PTH	PDGF	MPTF	Lp(a)					KIM-1	NT-ProBNP	NGAL	IL-18	ET-1	25(OH)D	PTH	PDGF	MPTF	Lp(a)
		KIM-1		0.367377	0.399642	0.286653	0.461838	0.598069	0.457375	0.586591	0.0324903	0.810617				KIM-1		-0.118451	-0.11073	0.139819	-0.0968074	0.0694369	0.0977701	-0.0716183	-0.29993	-0.031593
		NT-ProBNP	0.367377		0.598946	0.324127	0.0179044	0.455674	0.346454	0.585932	0.833227	0.331928				NT-ProBNP	-0.118451		0.0692712	-0.12948	0.304756	-0.0981384	0.12368	-0.0717441	-0.0302276	-0.127426
		NGAL	0.399642	0.598946		0.339631	0.865956	0.803432	0.383048	0.116304	0.719678	0.396436				NGAL	-0.11073	0.0692712		0.125427	0.0222571	0.0328156	0.114653	0.2049	0.0514979	-0.11148
		IL-18	0.286653	0.324127	0.339631		0.669835	0.0655655	0.395482	0.602258	0.335414	0.00327325				IL-18	0.139819	-0.12948	0.125427		0.0561831	-0.239289	-0.111704	0.0686456	-0.137653	-0.373665
		ET-1	0.461838	0.0179044	0.865956	0.669835		0.0601696	0.349348	0.719315	0.613958	0.0952677				ET-1	-0.0968074	0.304756	0.0222571	0.0561831		-0.244099	-0.122945	0.0473653	-0.0723352	-0.217358
		25(OH)D	0.598069	0.455674	0.803432	0.0655655	0.0601696		0.0849506	0.595704	0.0496071	0.906569				25(OH)D	0.0694369	-0.0981384	0.0328156	-0.239289	-0.244099		0.224269	-0.069885	-0.276393	0.0154767
		PTH	0.457375	0.346454	0.383048	0.395482	0.349348	0.0849506		0.0036219	0.381802	0.633363				PTH	0.0977701	0.12368	0.114653	-0.111704	-0.122945	0.224269		-0.369952	-0.125085	-0.0628413
		PDGF	0.586591	0.585932	0.116304	0.602258	0.719315	0.595704	0.0036219		0.230557	0.14527				PDGF	-0.0716183	-0.0717441	0.2049	0.0686456	0.0473653	-0.069885	-0.369952		0.170881	0.190306
		MPTF	0.0324903	0.833227	0.719678	0.335414	0.613958	0.0496071	0.381802	0.230557		0.164375				MPTF	-0.29993	-0.0302276	0.0514979	-0.137653	-0.0723352	-0.276393	-0.125085	0.170881		0.197683
		Lp(a)	0.810617	0.331928	0.396436	0.00327325	0.0952677	0.906569	0.633363	0.14527	0.164375					Lp(a)	-0.031593	-0.127426	-0.11148	-0.373665	-0.217358	0.0154767	-0.0628413	0.190306	0.197683
	CKD5D (+)CCAD														CKD5D (+)CCAD
			KIM-1	NT-ProBNP	NGAL	IL-18	ET-1	25(OH)D	PTH	PDGF	MPTF	Lp(a)					KIM-1	NT-ProBNP	NGAL	IL-18	ET-1	25(OH)D	PTH	PDGF	MPTF	Lp(a)
		KIM-1		0.358442	0.0202204	0.105711	0.636623	0.0215063	0.0882277	0.720107	0.826458	0.43244				KIM-1		0.173768	-0.421896	-0.301257	-0.0898976	0.418067	-0.316644	-0.0682427	-0.0442681	-0.148849
		NT-ProBNP	0.358442		0.390495	0.154904	0.264242	0.232103	0.119586	0.524764	0.184822	0.0303952				NT-ProBNP	0.173768		-0.162643	0.266296	-0.210479	0.224917	-0.290355	-0.120828	-0.263126	-0.395773
		NGAL	0.0202204	0.390495		0.287609	0.552013	0.393129	0.00106326	0.505691	0.987942	0.706757				NGAL	-0.421896	-0.162643		0.20069	-0.11304	-0.161753	0.567868	-0.126396	0.00305297	0.0716431
		IL-18	0.105711	0.154904	0.287609		0.889544	0.551315	0.281648	0.440709	0.82295	0.299267				IL-18	-0.301257	0.266296	0.20069		0.0264768	0.113237	0.203137	0.146218	-0.045177	0.195996
		ET-1	0.636623	0.264242	0.552013	0.889544		0.634149	0.78555	0.226376	0.519894	0.668807				ET-1	-0.0898976	-0.210479	-0.11304	0.0264768		-0.0905551	-0.0518469	0.227627	0.129446	0.0814329
		25(OH)D	0.0215063	0.232103	0.393129	0.551315	0.634149		0.632477	0.305914	0.82295	0.306027				25(OH)D	0.418067	0.224917	-0.161753	0.113237	-0.0905551		-0.0910001	-0.193371	-0.045177	-0.193326
		PTH	0.0882277	0.119586	0.00106326	0.281648	0.78555	0.632477		0.35777	0.172375	0.362833				PTH	-0.316644	-0.290355	0.567868	0.203137	-0.0518469	-0.0910001		-0.174008	0.270493	0.17221
		PDGF	0.720107	0.524764	0.505691	0.440709	0.226376	0.305914	0.35777		0.936953	0.887472				PDGF	-0.0682427	-0.120828	-0.126396	0.146218	0.227627	-0.193371	-0.174008		0.0159778	-0.0269767
		MPTF	0.826458	0.184822	0.987942	0.82295	0.519894	0.82295	0.172375	0.936953		0.341269				MPTF	-0.0442681	-0.263126	0.00305297	-0.045177	0.129446	-0.045177	0.270493	0.0159778		0.190476
		Lp(a)	0.43244	0.0303952	0.706757	0.299267	0.668807	0.306027	0.362833	0.887472	0.341269					Lp(a)	-0.148849	-0.395773	0.0716431	0.195996	0.0814329	-0.193326	0.17221	-0.0269767	0.190476
	CKD5D (-)ICAD														CKD5D (-)ICAD
			KIM-1	NT-ProBNP	NGAL	IL-18	ET-1	25(OH)D	PTH	PDGF	MPTF	Lp(a)					KIM-1	NT-ProBNP	NGAL	IL-18	ET-1	25(OH)D	PTH	PDGF	MPTF	Lp(a)
		KIM-1		0.997478	0.30162	0.380596	0.498453	0.158605	0.753248	0.899825	0.0203562	0.602561				KIM-1		-0.000396618	-0.129083	0.109696	-0.0847937	0.175535	-0.0394334	-0.0157958	-0.309317	-0.065275
		NT-ProBNP	0.997478		0.572968	0.633118	0.13211	0.822152	0.726209	0.680453	0.399483	0.0830621				NT-ProBNP	-0.000396618		0.0706479	-0.0598476	0.187289	-0.0282016	0.0439216	-0.0516476	-0.114806	-0.214946
		NGAL	0.30162	0.572968		0.234126	0.947471	0.911112	0.0514114	0.940578	0.924992	0.332968				NGAL	-0.129083	0.0706479		0.148478	-0.0082674	-0.0140085	0.240845	0.00935416	-0.0128707	-0.121045
		IL-18	0.380596	0.633118	0.234126		0.432511	0.26974	0.123462	0.913011	0.257738	0.0497817				IL-18	0.109696	-0.0598476	0.148478		-0.098258	-0.137835	-0.19151	0.013708	-0.153804	-0.242501
		ET-1	0.498453	0.13211	0.947471	0.432511		0.22772	0.276886	0.868639	0.142851	0.351648				ET-1	-0.0847937	0.187289	-0.0082674	-0.098258		-0.150508	-0.135816	-0.020752	0.198325	-0.116482
		25(OH)D	0.158605	0.822152	0.911112	0.26974	0.22772		0.259246	0.892379	0.0268223	0.661879				25(OH)D	0.175535	-0.0282016	-0.0140085	-0.137835	-0.150508		0.140867	-0.0169768	-0.295885	-0.0548377
		PTH	0.753248	0.726209	0.0514114	0.123462	0.276886	0.259246		0.00157079	0.838411	0.669867				PTH	-0.0394334	0.0439216	0.240845	-0.19151	-0.135816	0.140867		-0.38158	-0.0278741	-0.0534616
		PDGF	0.899825	0.680453	0.940578	0.913011	0.868639	0.892379	0.00157079		0.603984	0.17546				PDGF	-0.0157958	-0.0516476	0.00935416	0.013708	-0.020752	-0.0169768	-0.38158		0.0708216	0.168798
		MPTF	0.0203562	0.399483	0.924992	0.257738	0.142851	0.0268223	0.838411	0.603984		0.847324				MPTF	-0.309317	-0.114806	-0.0128707	-0.153804	0.198325	-0.295885	-0.0278741	0.0708216		0.0263176
		Lp(a)	0.602561	0.0830621	0.332968	0.0497817	0.351648	0.661879	0.669867	0.17546	0.847324					Lp(a)	-0.065275	-0.214946	-0.121045	-0.242501	-0.116482	-0.0548377	-0.0534616	0.168798	0.0263176
	CKD5D (+)ICAD														CKD5D (+)ICAD
			KIM-1	NT-ProBNP	NGAL	IL-18	ET-1	25(OH)D	PTH	PDGF	MPTF	Lp(a)					KIM-1	NT-ProBNP	NGAL	IL-18	ET-1	25(OH)D	PTH	PDGF	MPTF	Lp(a)
		KIM-1		0.437967	0.0296009	0.519391	0.521864	0.102167	0.852749	0.4355	0.669051	0.276818				KIM-1		-0.166087	-0.444348	-0.138261	-0.137451	0.341739	0.0400087	-0.16697	0.0965556	-0.231304
		NT-ProBNP	0.437967		0.475255	0.47272	0.561101	0.961404	0.588991	0.472806	0.958232	0.154363				NT-ProBNP	-0.166087		-0.153043	0.153913	0.124837	0.0104348	-0.116112	-0.153883	-0.0118577	-0.3
		NGAL	0.0296009	0.475255		0.919689	0.844805	0.447754	0.159337	0.535172	0.91459	0.467671				NGAL	-0.444348	-0.153043		0.0217391	-0.0421923	-0.162609	0.296586	0.133125	0.0242801	0.155652
		IL-18	0.519391	0.47272	0.919689		0.0850601	0.506209	0.0313866	0.148456	0.647236	0.746697				IL-18	-0.138261	0.153913	0.0217391		0.358852	-0.142609	0.440096	0.304156	0.103331	0.0695652
		ET-1	0.521864	0.561101	0.844805	0.0850601		0.0362992	0.930859	0.0774822	0.0406727	0.821158				ET-1	-0.137451	0.124837	-0.0421923	0.358852		-0.429317	-0.0187079	0.367268	-0.439548	-0.0487168
		25(OH)D	0.102167	0.961404	0.447754	0.506209	0.0362992		0.370427	0.0117555	0.691126	0.887734				25(OH)D	0.341739	0.0104348	-0.162609	-0.142609	-0.429317		0.191346	-0.505423	0.0897798	-0.0304348
		PTH	0.852749	0.588991	0.159337	0.0313866	0.930859	0.370427		0.247022	0.561069	0.604531				PTH	0.0400087	-0.116112	0.296586	0.440096	-0.0187079	0.191346		-0.24577	0.131036	0.111329
		PDGF	0.4355	0.472806	0.535172	0.148456	0.0774822	0.0117555	0.247022		0.422128	0.956606				PDGF	-0.16697	-0.153883	0.133125	0.304156	0.367268	-0.505423	-0.24577		0.180257	-0.011733
		MPTF	0.669051	0.958232	0.91459	0.647236	0.0406727	0.691126	0.561069	0.422128		0.11584				MPTF	0.0965556	-0.0118577	0.0242801	0.103331	-0.439548	0.0897798	0.131036	0.180257		0.345003
		Lp(a)	0.276818	0.154363	0.467671	0.746697	0.821158	0.887734	0.604531	0.956606	0.11584					Lp(a)	-0.231304	-0.3	0.155652	0.0695652	-0.0487168	-0.0304348	0.111329	-0.011733	0.345003
	CKD5D (-)stroke														CKD5D (-)stroke
			KIM-1	NT-ProBNP	NGAL	IL-18	ET-1	25(OH)D	PTH	PDGF	MPTF	Lp(a)					KIM-1	NT-ProBNP	NGAL	IL-18	ET-1	25(OH)D	PTH	PDGF	MPTF	Lp(a)
		KIM-1		0.77084	0.0732676	0.198098	0.884661	0.0469833	0.677709	0.34903	0.0521284	0.811326				KIM-1		-0.0359781	-0.218627	0.158017	-0.0179224	0.241788	0.0513161	-0.115323	-0.254106	-0.029489
		NT-ProBNP	0.77084		0.640452	0.485397	0.290123	0.980775	0.78328	0.549183	0.900002	0.447454				NT-ProBNP	-0.0359781		-0.057662	-0.0860404	0.13015	0.00297744	0.0339747	-0.0739085	-0.0167159	-0.0936567
		NGAL	0.0732676	0.640452		0.714834	0.488194	0.853766	0.288804	0.247991	0.896169	0.0806744				NGAL	-0.218627	-0.057662		0.0451218	-0.0854918	-0.0227709	0.130503	0.142015	0.01736	-0.213338
		IL-18	0.198098	0.485397	0.714834		0.913521	0.365336	0.497902	0.755631	0.34716	0.0132896				IL-18	0.158017	-0.0860404	0.0451218		-0.0134177	-0.111501	-0.0836005	0.0384401	-0.12458	-0.298892
		ET-1	0.884661	0.290123	0.488194	0.913521		0.212509	0.0894284	0.998878	0.750647	0.310361				ET-1	-0.0179224	0.13015	-0.0854918	-0.0134177		-0.15313	-0.207562	-0.000173677	0.0422578	-0.124854
		25(OH)D	0.0469833	0.980775	0.853766	0.365336	0.212509		0.360383	0.821539	0.0231405	0.897486				25(OH)D	0.241788	0.00297744	-0.0227709	-0.111501	-0.15313		0.112651	-0.0278652	-0.295362	-0.015918
		PTH	0.677709	0.78328	0.288804	0.497902	0.0894284	0.360383		0.00414762	0.738569	0.812581				PTH	0.0513161	0.0339747	0.130503	-0.0836005	-0.207562	0.112651		-0.343369	-0.0443785	-0.0292891
		PDGF	0.34903	0.549183	0.247991	0.755631	0.998878	0.821539	0.00414762		0.436689	0.274636				PDGF	-0.115323	-0.0739085	0.142015	0.0384401	-0.000173677	-0.0278652	-0.343369		0.103198	0.134368
		MPTF	0.0521284	0.900002	0.896169	0.34716	0.750647	0.0231405	0.738569	0.436689		0.130932				MPTF	-0.254106	-0.0167159	0.01736	-0.12458	0.0422578	-0.295362	-0.0443785	0.103198		0.198927
		Lp(a)	0.811326	0.447454	0.0806744	0.0132896	0.310361	0.897486	0.812581	0.274636	0.130932					Lp(a)	-0.029489	-0.0936567	-0.213338	-0.298892	-0.124854	-0.015918	-0.0292891	0.134368	0.198927
	CKD5D (+)stroke														CKD5D (+)stroke
			KIM-1	NT-ProBNP	NGAL	IL-18	ET-1	25(OH)D	PTH	PDGF	MPTF	Lp(a)					KIM-1	NT-ProBNP	NGAL	IL-18	ET-1	25(OH)D	PTH	PDGF	MPTF	Lp(a)
		KIM-1		0.785554	0.266019	0.0255319	0.0766706	0.982093	0.230415	0.734716	0.596303	0.393465				KIM-1		-0.0615471	-0.247883	-0.474873	-0.385202	0.00508187	-0.266591	0.0766105	0.129825	-0.191417
		NT-ProBNP	0.785554		0.539242	0.118405	0.218329	0.978115	0.557667	0.940287	0.068743	0.0038444				NT-ProBNP	-0.0615471		0.13834	0.342744	0.273369	0.00621118	-0.132166	0.0169596	-0.426316	-0.590062
		NGAL	0.266019	0.539242		0.056989	0.519231	0.970159	0.0273291	0.69212	0.914838	0.308456				NGAL	-0.247883	0.13834		0.411632	0.145157	0.00846979	0.469924	-0.0894764	-0.0263158	0.227555
		IL-18	0.0255319	0.118405	0.056989		0.116368	0.54595	0.252604	0.229205	0.943171	0.503046				IL-18	-0.474873	0.342744	0.411632		0.344535	-0.136081	0.25473	0.26726	0.0175439	0.150762
		ET-1	0.0766706	0.218329	0.519231	0.116368		0.140295	0.391772	0.152907	0.392859	0.319535				ET-1	-0.385202	0.273369	0.145157	0.344535		-0.324767	0.19209	0.315303	-0.207986	-0.222536
		25(OH)D	0.982093	0.978115	0.970159	0.54595	0.140295		0.193605	0.0265836	0.689053	0.434394				25(OH)D	0.00508187	0.00621118	0.00846979	-0.136081	-0.324767		0.288054	-0.471944	0.0982456	-0.175607
		PTH	0.230415	0.557667	0.0273291	0.252604	0.391772	0.193605		0.108611	0.518358	0.853482				PTH	-0.266591	-0.132166	0.469924	0.25473	0.19209	0.288054		-0.351572	0.157964	0.0417961
		PDGF	0.734716	0.940287	0.69212	0.229205	0.152907	0.0265836	0.108611		0.419839	0.834189				PDGF	0.0766105	0.0169596	-0.0894764	0.26726	0.315303	-0.471944	-0.351572		0.1966	0.0473699
		MPTF	0.596303	0.068743	0.914838	0.943171	0.392859	0.689053	0.518358	0.419839		0.37097				MPTF	0.129825	-0.426316	-0.0263158	0.0175439	-0.207986	0.0982456	0.157964	0.1966		0.217544
		Lp(a)	0.393465	0.0038444	0.308456	0.503046	0.319535	0.434394	0.853482	0.834189	0.37097					Lp(a)	-0.191417	-0.590062	0.227555	0.150762	-0.222536	-0.175607	0.0417961	0.0473699	0.217544
